# Supplementary material
Source: Springer Nature journal article supplement (https://www.springermedizin.de/resource/supplementary/12913_2012_2453_MOESM2_ESM.docx/9530552)
Supplement: MOESM2 [file 9530552]

**Appendix 2**

*Mean ages and standard deviations of respondents compared to Tuscany region population*

|  |  | *Females* | *Males* | *Total* |
| --- | --- | --- | --- | --- |
| RESPONDENTS | |  |  |  |
|  | 18-45 | 36.5 (7.1) | 32.9 (9.0) | 36.0 (8.0) |
|  | 46-65 | 56.5 (5.8) | 57.5 (5.6) | 57.0 (6.0) |
|  | +65 | 74.2 (5.9) | 74.8 (6.3) | 74.0 (6.0) |
|  | Total | 56.9 (15.9) | 58.8 (17.4) | 57.3 (16.2) |
|  |  |  |  |  |
| POPULATION | |  |  |  |
|  | 18-45 | 33.5 (7.7) | 33.4 (7.8) | 33.5 (7.8) |
|  | 46-65 | 55.2 (5.8) | 55.1 (5.8) | 55.2 (5.8) |
|  | +65 | 77.0 (7.5) | 75.4 (6.8) | 76.3 (7.3) |
|  | Total | 52.8 (19.3) | 50.0 (18.1) | 51.5 (18.8) |
